# Supplementary material
Source: PubMed Central journal article supplement (PMC3024769)
Supplement: supp_M110.192344_jbc.M110.192344-1.pdf [file supp_M110.192344_jbc.M110.192344-1.pdf]

**SUPPLEMENTAL FIGURE LEGENDS**

- Fig. S1. **Relative mRNA expression of mouse PC7 in different tissues.** Quantitative polymerase chain reactions were performed on RNA isolated from mouse tissue using specific oligonucleotides for mouse PC7 and normalized to  $10^6$  S16 mRNA levels, as described in the Experimental Procedures.
- Fig. S2. **PC7 traffics through an unconventional pathway in COS-1 cells.** Immunostaining of PC7 (*red labeling*) and LDLR (*green labeling*) under non-permeabilizing conditions in COS-1 cells expressing either r-PC7 or human LDLR as control, treated or not with BFA (5  $\mu$ g/ml) for 6h. Nuclei were stained with Hoescht 33258 (*blue labeling*). Bars = 10  $\mu$ m.
- Fig. S3. **PC7 does not induce ER stress.** Xbp-1 mRNA splicing from HEK293 cells expressing, or not, r-PC7 or treated for 4h with tunicamycin (5  $\mu$ g/ml), was assessed by RT-PCR. A 263 bp amplicon (*s*) was generated from spliced Xbp-1 in cells treated with tunicamycin, whereas only an unspliced (*u*) Xbp-1 amplicon (289 bp) was detected in HEK293 cells transfected with r-PC7, demonstrating that PC7 does not induce ER stress.

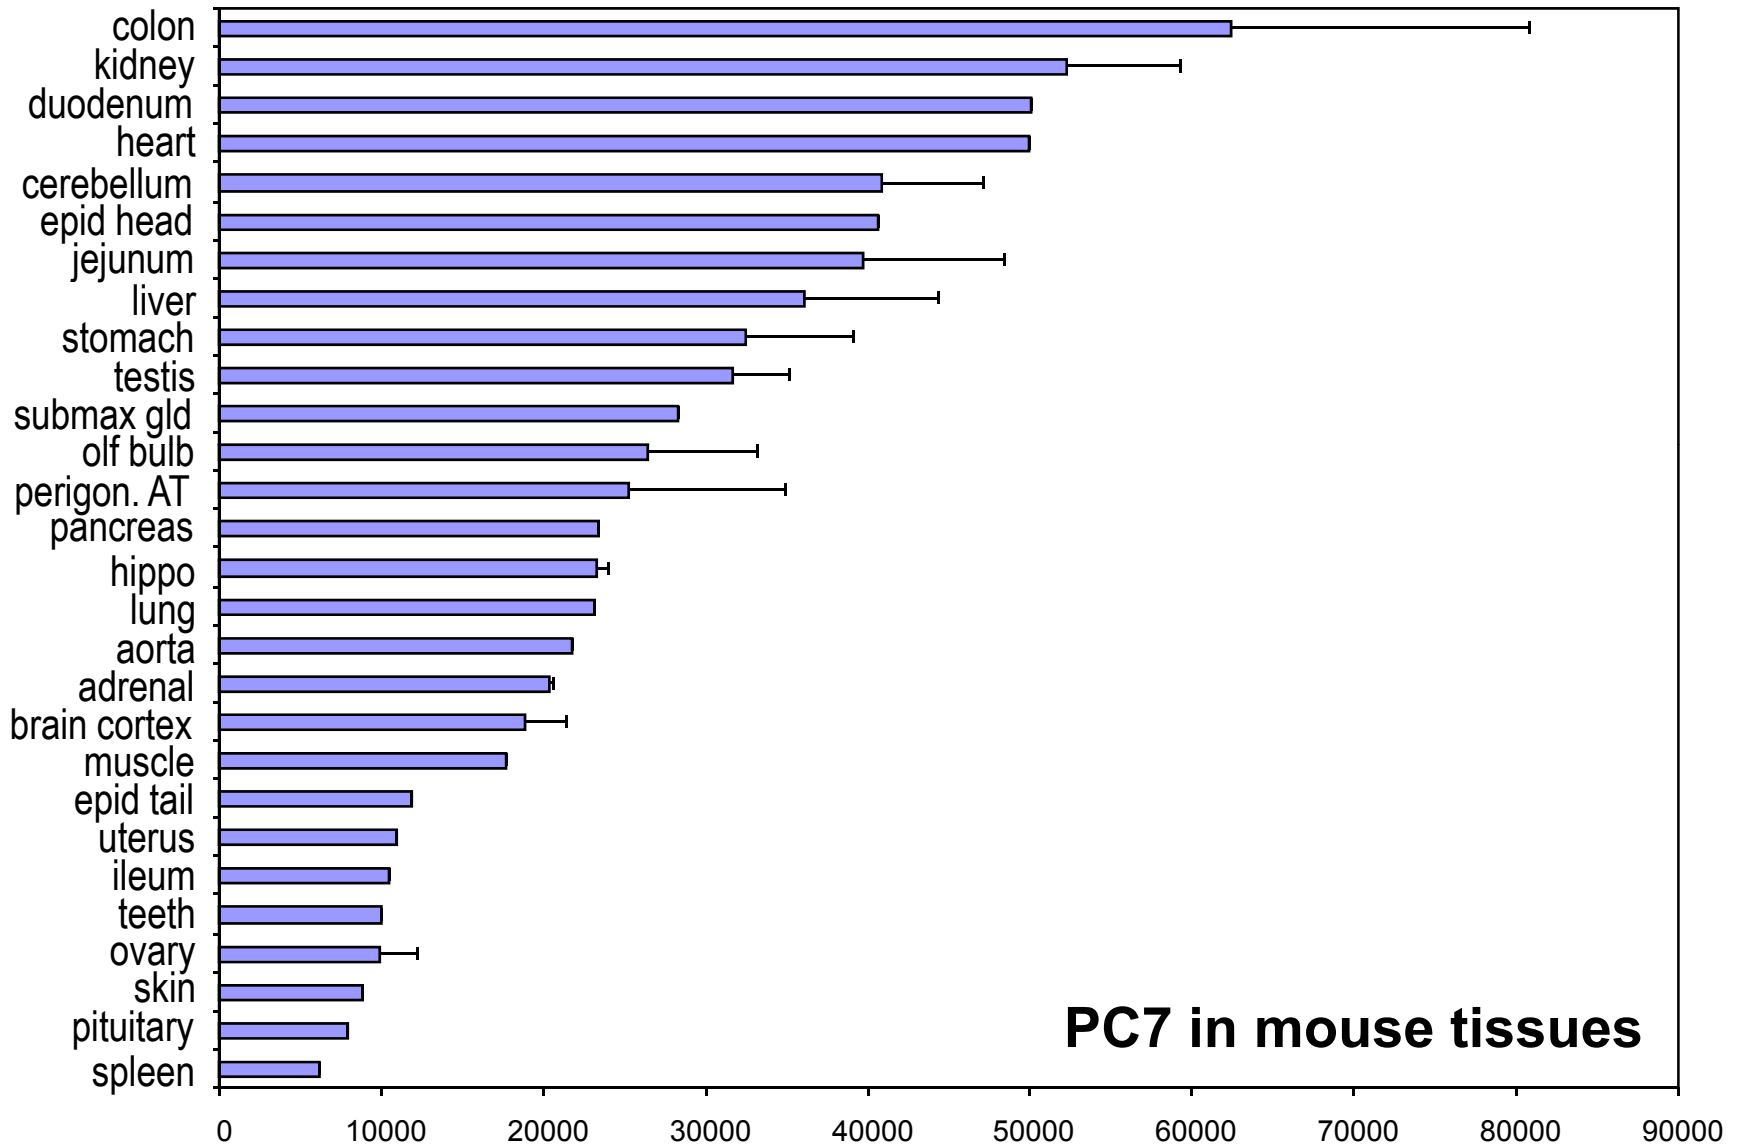

Figure S1

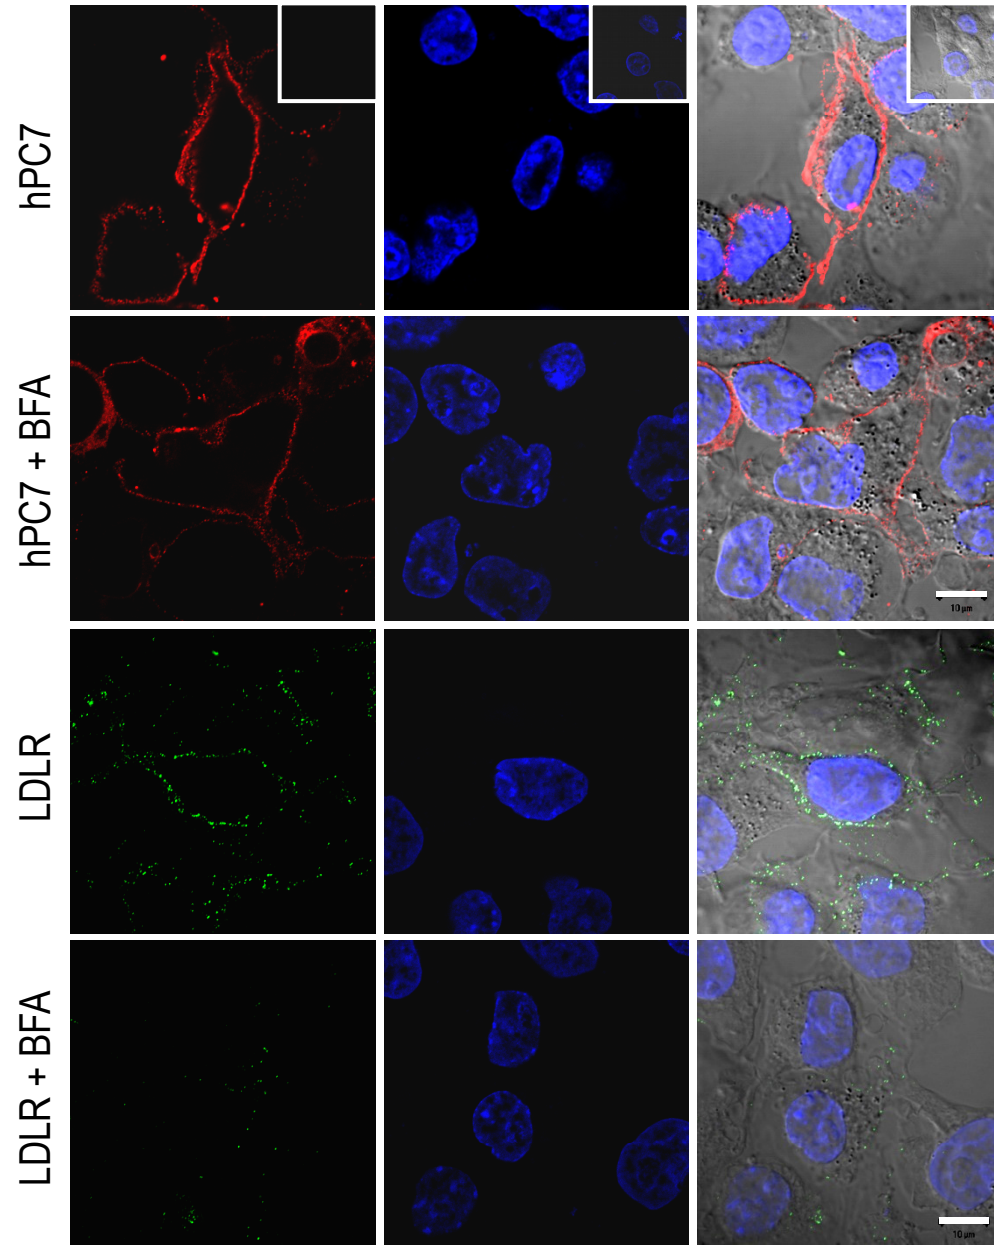

Figure S2

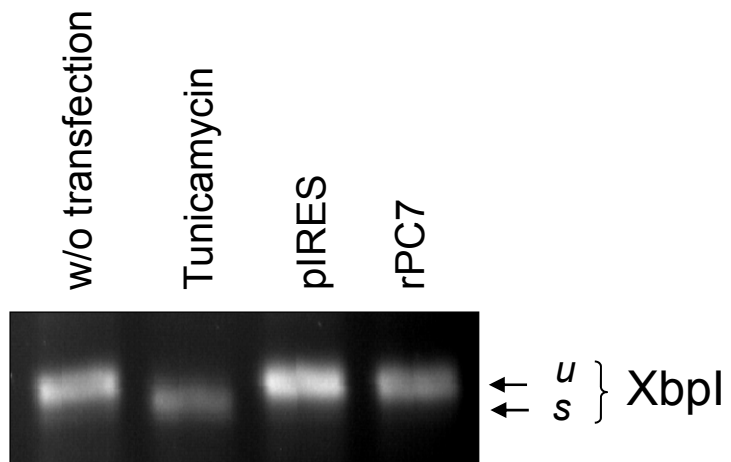

Figure S3

**Table S1. Oligonucleotides used for site-directed mutagenesis of PC7 and for the swapping of CT and TMCT of PC7 and Furin.**

| <b>Mutants</b>              | <b>Sense</b>                           | <b>Antisense</b>                        |
|-----------------------------|----------------------------------------|-----------------------------------------|
| h-PC7 (C699A, C704A)        | CAAGTTGCTAGGAGTGGACCC<br>GCCCACTGGCCCC | GTGGGCGGGTCCACTCCTAGC<br>AACTTGATTGG    |
| h-PC7 <sub>CT-Furin</sub>   | GGAAGTATATTTGCGCTCTGGC<br>TTTAGTTTTTCG | CCAGAGCGCAAATATACTTCCA<br>GCATGTAGTAAAC |
| h-PC7 <sub>TMCT-Furin</sub> | CTCAAGACCGTGGTGGCCGG<br>CC             | GGCCACCACGGTCTTGAGGGT<br>GTTGGGGG       |
| h-Furin <sub>CT-PC7</sub>   | GCAGCTGAGCCAGAGGAATGT<br>GG            | CCTCTGGCTCAGCTGCAGGAC<br>CAGG           |
| h-Furin <sub>TMCT-PC7</sub> | GCCTGAGCTGGTGGTGGTAGG<br>CTG           | GCACCAGCTCAGGCAGGTGTG<br>AGGG           |

**Table S2: Oligonucleotides used for quantitative real time-PCR.**

| <b>Mutants</b> | <b>Sense</b>          | <b>Antisense</b>      |
|----------------|-----------------------|-----------------------|
| Mouse PC7      | GTTATCAGGGATGTAGGAGA  | AAGGGTCTTGAGTGTGTTAG  |
| Mouse S16      | AGGAGCGATTTGCTGGTGTGG | GCTACCAGGGCCTTTGAGATG |
